# Supplementary material
Source: publisher site journal article supplement (https://www.dovepress.com/article/102494)
Supplement: Supplementary file 1 [file get_supplementary_file.php]

## SUPPLEMENTARY MATERIALS

**Table S1. Excluded medications prior to Visit 1**

| Medication                                                                                                         | Time interval                                                                           |
|--------------------------------------------------------------------------------------------------------------------|-----------------------------------------------------------------------------------------|
| Depot corticosteroids                                                                                              | 12 weeks                                                                                |
| Systemic, oral or parenteral corticosteroids                                                                       | 6 weeks                                                                                 |
| Antibiotics (for lower respiratory tract infection)                                                                | 6 weeks                                                                                 |
| LABA/ICS combination products if LABA/ICS therapy is discontinued completely                                       | 30 days                                                                                 |
| LABA/ICS combination products only If discontinuing ICS/LABA therapy and switching to ICS monotherapy <sup>a</sup> | 48 h for the salmeterol or formoterol component<br>14 days for the vilanterol component |
| Use of ICS at a dose >1000 mcg/day of FP or equivalent <sup>b</sup>                                                | 30 days                                                                                 |
| Initiation or discontinuation of ICS use <sup>b</sup>                                                              | 30 days                                                                                 |
| Phosphodiesterase 4 inhibitor (roflumilast)                                                                        | 14 days                                                                                 |
| Inhaled LABAs:                                                                                                     |                                                                                         |
| -salmeterol, formoterol                                                                                            | 48 h                                                                                    |
| -olodaterol, indacaterol, vilanterol                                                                               | 14 days                                                                                 |
| LAMAs:                                                                                                             | 7 days                                                                                  |
| -tiotropium, aclidinium, glycopyrronium, umeclidinium                                                              |                                                                                         |
| LAMA/LABA combination products if LAMA/LABA therapy is discontinued completely                                     | Apply whichever mono component has the longest washout                                  |
| Theophyllines                                                                                                      | 48 h                                                                                    |
| Oral beta <sub>2</sub> -agonists                                                                                   |                                                                                         |
| Long-acting                                                                                                        | 48 h                                                                                    |
| Short-acting                                                                                                       | 12 h                                                                                    |
| Inhaled short-acting β <sub>2</sub> -agonists <sup>c</sup>                                                         | 4 h                                                                                     |
| Inhaled short-acting anticholinergics                                                                              | 4 h                                                                                     |
| Inhaled short-acting anticholinergic/short-acting β <sub>2</sub> -agonist combination products                     | 4 h                                                                                     |
| Any other investigational medication                                                                               | 30 days or within 5 drug half-lives (whichever is longer)                               |

FP, fluticasone propionate; ICS, inhaled corticosteroid; LABA, long-acting β<sub>2</sub> agonists; LAMA, long-acting muscarinic antagonists; TIO, tiotropium; UMEC, umeclidinium.

<sup>a</sup>The dose of ICS must have been a dose of FP or equivalent but must not have exceeded 1000 mcg/day; <sup>b</sup>use of ICS was permitted provided the dose did not exceed FP 1000 mcg or equivalent; ICS use was not to be initiated or discontinued within 30 days prior to Visit 1, except for patients receiving LABA/ICS therapy who could have discontinued the ICS/LABA product as indicated in the table above and switched to ICS monotherapy; <sup>c</sup>use of study provided albuterol/salbutamol was permitted during the study, except in the 4-h period prior to spirometry testing.

### Blinding procedure

The tiotropium (TIO) capsules had trade markings but the placebo (PBO) capsules, while closely matched in color, did not have trade markings. Both were packaged similarly. Blister packages for both TIO and PBO were covered with opaque over-labels in order to shield information appearing on the commercial blister packaging

of TIO. Furthermore, the identifying marks on the inhaler were masked by covering them with labels. As neither patients nor research staff were aware of how the labels related to the treatments, they were blinded to the allocation group. As this was a double-dummy study, each patient took one dose from the HandiHaler® dry powder inhaler (DPI) and one dose from the ELLIPTA™ DPI each morning. The study participants, investigator, and the coordinator involved with efficacy and safety assessments were blinded to treatment assignment to guard against the possibility that they would observe and draw inferences from the presence or absence of markings on capsules removed from the blisters.

**Table S2. FVC (ITT population)**

|                                       | <b>UMEC 62.5 mcg<br/>(N=509)</b> | <b>TIO 18 mcg<br/>(N=508)</b> | <b>Treatment Diff. vs TIO<br/>(95% CI)</b> |
|---------------------------------------|----------------------------------|-------------------------------|--------------------------------------------|
| <b>Trough FVC at Day 2</b>            | n=497                            | n=492                         |                                            |
| LS mean change from baseline, mL (SE) | 152 (14)                         | 131 (14)                      | 21 (-17, 60); p=0.274                      |
| <b>Trough FVC at Day 28</b>           | n=491                            | n=489                         |                                            |
| LS mean change from baseline, mL (SE) | 194 (16)                         | 138 (16)                      | 56 (13, 99); p=0.011                       |
| <b>Trough FVC at Day 56</b>           | n=473                            | n=480                         |                                            |
| LS mean change from baseline, mL (SE) | 174 (16)                         | 118 (16)                      | 56 (11, 102); p=0.016                      |
| <b>Trough FVC at Day 84</b>           | n=469                            | n=474                         |                                            |
| LS mean change from baseline, mL (SE) | 187 (16)                         | 108 (16)                      | 79 (34, 125); p<0.001                      |
| <b>Trough FVC at Day 85</b>           | n=459                            | n=466                         |                                            |
| LS mean change from baseline, mL (SE) | 192 (17)                         | 112 (17)                      | 80 (34, 127); p<0.001                      |

CI, confidence interval; FVC, forced vital capacity; ITT, intent-to-treat; LS, least squares; SE, standard error; TIO, tiotropium; UMEC, umeclidinium.

Analyses were performed using a repeated measures model with covariates of treatment, baseline FVC (the mean of the two assessments made 30 min and 5 min pre-dose on Day 1), center group, 24 h subset flag, day, day-by-baseline and day-by-treatment interactions.

**Table S3. Symptomatic and health-related quality of life endpoints at other time points**

|                                                   | <b>UMEC 62.5 mcg<br/>(N=509)</b> | <b>TIO 18 mcg<br/>(N=508)</b> | <b>Treatment Diff. vs TIO<br/>(95% CI)</b> |
|---------------------------------------------------|----------------------------------|-------------------------------|--------------------------------------------|
| <b>TDI focal score at Day 28</b>                  | n=489                            | n=490                         |                                            |
| LS mean, (SE)                                     | 1.50 (0.12)                      | 1.52 (0.12)                   | -0.02 (-0.35, 0.32); p=0.924               |
| <b>TDI responder at Day 28, n (%)<sup>a</sup></b> | 271 (54)                         | 262 (52)                      | OR: 1.07 (0.84, 1.37); p=0.583             |
| <b>TDI focal score at Day 56</b>                  | n=476                            | n=482                         |                                            |
| LS mean, (SE)                                     | 1.75 (0.13)                      | 1.70 (0.13)                   | 0.04 (-0.31, 0.40); p=0.809                |
| <b>TDI responder at Day 56, n (%)<sup>b</sup></b> | 275 (54)                         | 271 (54)                      | OR: 1.02 (0.80, 1.31); p=0.850             |
| <b>SGRQ score at Day 28</b>                       | n=473                            | n=477                         |                                            |
| LS mean change from baseline, (SE)                | -4.09 (0.50)                     | -3.99 (0.50)                  | -0.10 (-1.48, 1.29); p=0.891               |
| <b>SGRQ responder at Day 28<sup>c</sup></b>       | 226 (46)                         | 229 (47)                      | OR: 0.98 (0.76, 1.27); p=0.892             |
| <b>CAT score, Day 28</b>                          | n=493                            | n=492                         |                                            |
| LS mean change from baseline, (SE)                | -1.34 (0.24)                     | -1.03 (0.24)                  | -0.31 (-0.97, 0.34); p=0.349               |
| <b>CAT responder at Day 28</b>                    | 233 (46)                         | 221 (44)                      | OR: 1.11 (0.86, 1.43); p=0.437             |

CAT, COPD Assessment Test; CI, confidence interval; COPD, chronic obstructive pulmonary disease; ITT, intent-to-treat; OR, odds ratio; SGRQ, St George's Respiratory Questionnaire; SE, standard error; TDI, transition dyspnea; TIO, tiotropium; UMEC, umeclidinium. <sup>a</sup>UMEC n=504, TIO n=504; <sup>b</sup>UMEC n=505, TIO n=504; <sup>c</sup>UMEC n=490, TIO n=492.

**Table S4. Post hoc analyses of trough FEV<sub>1</sub> at Day 85**

|                                                                                             | <b>UMEC 62.5 mcg<br/>(N=509)</b> | <b>TIO 18 mcg<br/>(N=508)</b> | <b>Treatment Diff. vs TIO<br/>(95% CI)</b> |
|---------------------------------------------------------------------------------------------|----------------------------------|-------------------------------|--------------------------------------------|
| <b>GOLD Grade 2</b>                                                                         | n=281                            | n=281                         |                                            |
| LS mean change from baseline, mL (SE) <sup>a</sup>                                          | 177 (14)                         | 114 (14)                      | 63 (25, 100); p=0.001                      |
| <b>GOLD Grade 3</b>                                                                         | n=226                            | n=223                         |                                            |
| LS mean change from baseline, mL (SE) <sup>a</sup>                                          | 108 (16)                         | 69 (16)                       | 39 (-4, 82); p=0.074                       |
| <b>GOLD Group B</b>                                                                         | n=244                            | n=227                         |                                            |
| LS mean change from baseline, mL (SE) <sup>a</sup>                                          | 171 (15)                         | 114 (16)                      | 57 (16, 98); p=0.006                       |
| <b>GOLD Group D</b>                                                                         | n=263                            | n=277                         |                                            |
| LS mean change from baseline, mL (SE) <sup>a</sup>                                          | 124 (15)                         | 78 (14)                       | 46 (7, 85); p=0.020                        |
| <b>ICS users at screening</b>                                                               | n=246                            | n=229                         |                                            |
| LS mean change from baseline, mL (SE) <sup>a</sup>                                          | 147 (15)                         | 81 (15)                       | 66 (25, 107); p=0.002                      |
| <b>ICS non-users at screening</b>                                                           | n=262                            | n=275                         |                                            |
| LS mean change from baseline, mL (SE) <sup>a</sup>                                          | 146 (14)                         | 104 (14)                      | 42 (3, 81); p=0.035                        |
| <b>GOLD Grade 2 and ICS users at screening</b>                                              | n=122                            | n=114                         |                                            |
| LS mean change from baseline, mL (SE) <sup>a</sup>                                          | 172 (21)                         | 108 (21)                      | 64 (6, 122); p=0.030                       |
| <b>GOLD Grade 2 and ICS non-users at screening</b>                                          | n=159                            | n=167                         |                                            |
| LS mean change from baseline, mL (SE) <sup>a</sup>                                          | 181 (19)                         | 119 (18)                      | 62 (13, 111); p=0.013                      |
| <b>GOLD Grade 3 and ICS users at screening</b>                                              | n=124                            | n=115                         |                                            |
| LS mean change from baseline, mL (SE) <sup>a</sup>                                          | 118 (22)                         | 53 (22)                       | 65 (7, 123); p=0.028                       |
| <b>GOLD Grade 3 and ICS non-users at screening</b>                                          | n=102                            | n=108                         |                                            |
| LS mean change from baseline, mL (SE) <sup>a</sup>                                          | 97 (24)                          | 88 (23)                       | 9 (-55, 72); p=0.784                       |
| <b>Proportion of patients with trough FEV<sub>1</sub> ≥100 mL<br/>above baseline, n (%)</b> | 268 (53)                         | 228 (45)                      | OR:<br>1.35 (1.06, 1.74); p=0.017          |

CI, confidence interval; GOLD, Global initiative for chronic Obstructive Lung Disease; OR, odds ratio; LS, least squares; SE, standard error; TIO, tiotropium; UMEC, umeclidinium. n values represent the number of patients with analyzable data for ≥1 time points. <sup>a</sup>Analysis performed using a repeated measures model with covariates of treatment, baseline FEV<sub>1</sub> (mean of the two assessments made 30 min and 5 min pre-dose on Day 1), center group, 24 h subset flag, GOLD grade/GOLD group/ICS use, day, day-by-baseline and day-by-GOLD grade/GOLD group/ICS use and Day by GOLD grade/GOLD group/ICS use by treatment interactions.

**Table S5. Summary of change from baseline in vital signs at Day 85 (ITT population)**

|                                | <b>UMEC 62.5 mcg<br/>(N=509)</b> | <b>TIO 18 mcg<br/>(N=508)</b> |
|--------------------------------|----------------------------------|-------------------------------|
|                                | n=463                            | n=470                         |
| Systolic blood pressure, mmHg  | -0.5 (12.7)                      | -0.1 (11.5)                   |
| Diastolic blood pressure, mmHg | -0.9 (8.9)                       | -0.2 (8.2)                    |
| Heart rate, bpm                | -0.5 (9.6)                       | 0.9 (8.5)                     |

bpm, beats per minute; ITT, intent-to-treat; SD, standard deviation; TIO, tiotropium; UMEC, umeclidinium. Values are presented as mean (SD); baseline was the most recent recorded value before dosing on Day 1.

**Table S6. Summary of on-treatment adverse events of special interest (ITT population)**

|                                                                         | <b>UMEC<br/>62.5 mcg<br/>(N=509)</b> | <b>TIO<br/>18 mcg<br/>(N=508)</b> |
|-------------------------------------------------------------------------|--------------------------------------|-----------------------------------|
| <b>Cardiovascular Effects</b>                                           |                                      |                                   |
| Any event                                                               | 9 (2)                                | 10 (2)                            |
| Cardiac arrhythmia (SMQ)                                                |                                      |                                   |
| Any term                                                                | 7 (1)                                | 3 (<1)                            |
| Atrial fibrillation                                                     | 1 (<1)                               | 0                                 |
| Heart rate decreased                                                    | 0                                    | 1 (<1)                            |
| Heart rate increased                                                    | 1 (<1)                               | 1 (<1)                            |
| Palpitations                                                            | 1 (<1)                               | 0                                 |
| Syncope                                                                 | 0                                    | 1 (<1)                            |
| Tachycardia                                                             | 4 (<1)                               | 0                                 |
| Cardiac failure (SMQ)                                                   |                                      |                                   |
| Any term                                                                | 0                                    | 3 (<1)                            |
| Cardiac failure congestive                                              | 0                                    | 1 (<1)                            |
| Edema                                                                   | 0                                    | 1 (<1)                            |
| Peripheral swelling                                                     | 0                                    | 1 (<1)                            |
| Ischemic heart disease (SMQ)                                            |                                      |                                   |
| Any term                                                                | 2 (<1)                               | 2 (<1)                            |
| Angina pectoris                                                         | 1 (<1)                               | 2 (<1)                            |
| Angina unstable                                                         | 1 (<1)                               | 0                                 |
| Central nervous system hemorrhages and cerebrovascular conditions (SMQ) |                                      |                                   |
| Any term                                                                | 0                                    | 2 (<1)                            |
| Cerebrovascular disorder                                                | 0                                    | 2 (<1)                            |
| Vascular encephalopathy                                                 | 0                                    | 2 (<1)                            |
| <b>Pneumonia</b>                                                        |                                      |                                   |
| Any event                                                               | 2 (<1)                               | 2 (<1)                            |
| Any term                                                                | 2 (<1)                               | 2 (<1)                            |
| Lobar pneumonia                                                         | 1 (<1)                               | 0                                 |
| Pneumonia                                                               | 1 (<1)                               | 2 (<1)                            |
| <b>LRTI (excluding pneumonia)</b>                                       |                                      |                                   |
| Any event                                                               | 5 (<1)                               | 3 (<1)                            |
| Bronchitis                                                              | 4 (<1)                               | 1 (<1)                            |
| LRTI                                                                    | 0                                    | 1 (<1)                            |
| Infective exacerbation of chronic obstructive airways disease           | 1 (<1)                               | 1 (<1)                            |

ITT, intent-to-treat; LRTI, lower respiratory tract infection; MedDRA, Medical Dictionary of Regulatory Activities; SMQ, Standardized MedDRA Queries; TIO, tiotropium; UMEC, umeclidinium.
